# Supplementary material for: An insight into the solvent effect on the positional selectivity of the immobilized lipase from Burkholderia cepacia in 1,3-diolein synthesis
Source: Royal Society of Chemistry journal article supplement (doi:10.1039/c5ra01218j), 2015-01-01
Supplement: c5ra01218j1.pdf [file c5ra01218j1.pdf]

1 **Electronic Supplementary Information (ESI):**

2 **An insight into the solvent effect on the positional selectivity of the immobilized lipase from**  
3 ***Burkholderia cepacia* in 1,3-diolein synthesis**

4 Yan-Hong Bi,<sup>a</sup> Zhao-Yu Wang,<sup>a,c\*</sup> Zhang-Qun Duan,<sup>b</sup> Xiang-Jie Zhao,<sup>a</sup> Xiao-Ming Chen,<sup>a</sup> and  
5 Ling-Hong Nie<sup>a</sup>

6

7 <sup>a</sup> School of Life Science and Chemical Engineering, Huaiyin Institute of Technology, Huai'an  
8 223003, PR China. Email: zhaoyu\_wang@126.com

9 <sup>b</sup> Academy of State Administration of Grain, Beijing 100037, PR China

10 <sup>c</sup> Jiangsu Provincial Engineering Laboratory for Biomass Conversion and Process Integration,  
11 Huai'an 223005, PR China

12

13 **Experimental section**

14 **Biological and chemical materials**

15 The lipase from *Burkholderia cepacia* (PSL-C, immobilized on ceramics, 35.8 U g<sup>-1</sup>, one unit was  
16 defined as the amount of enzyme which catalyzed the esterification of 1 mmol oleic acid with  
17 glycerol per minute at 50 °C) was a gift from Amano Enzyme China Ltd.. 1-Monoolein, 2-  
18 monoolein, 1,2-diolein, 1,3-diolein and triolein were purchased from Sigma-Aldrich. All other  
19 chemicals and reagents were of the highest purity commercially available.

20

21 **General procedure for 1,3-diolein preparation**

22 In a typical experiment, the PSL-C-catalyzed esterification of oleic acid with glycerol proceeded

1 in a 50 mL flask on a rotary shaker at 200 rpm at 50 °C. The reaction mixtures contained oleic  
2 acid, glycerol, solvent and PSL-C. Certain amount of 4 Å molecular sieves was employed to  
3 remove the generated water online. Samples were withdrawn, centrifuged to obtain the upper layer  
4 and analyzed by HPLC and GC.

5

## 6 **Analysis of the samples**

7 1-Monoolein, 2-monoolein, 1,2-diolein, 1,3-diolein and triolein contents in the reaction mixture  
8 were analyzed using the methods described by us previously.<sup>1</sup> Shimadzu 20A HPLC system  
9 (Shimadzu, Kyoto, Japan) with a low temperature evaporative light scattering detector was  
10 employed. External standards of 1-monoolein, 2-monoolein, 1,2-diolein, 1,3-diolein and triolein  
11 were used to prepare calibration solutions at eight different concentrations. 2  $\mu\text{L}$  sample and 1 mL  
12 acetone were precisely measured and mixed thoroughly. 20  $\mu\text{L}$  of the aforementioned mixture was  
13 injected. The stationary and mobile phases were a C18 column (5  $\mu\text{m}$ , 250 mm  $\times$  4.6 mm) (Dikma  
14 Technology, PLATISIL ODS, China) and a gradient elution program (Table 1s) by acetonitrile  
15 and dichloromethane at 1.5 mL  $\text{min}^{-1}$ , respectively. The column temperature and drift pipe  
16 temperature were controlled at 40 °C and 70 °C, respectively, and the nitrogen pressure was  
17 controlled at 320 kPa. The retention times were 3.75 min, 4.54 min, 23.12 min, 23.90 min, and  
18 42.91 min for 2-monoolein, 1-monoolein, 1,3-diolein, 1,2-diolein and triolein, respectively. The  
19 oleic acid and glycerol concentrations were detected using the methods described by Du.<sup>2</sup> The  
20 oleic acid content was analyzed by GC-14B gas chromatograph (Shimadzu, Kyoto, Japan)  
21 equipped with a FFAP capillary column (0.32 mm  $\times$  25 m) and FID detector. The column  
22 temperature was kept at 150 °C for 0.5 min, raised to 250 °C at 15 °C  $\text{min}^{-1}$ , and maintained at this

1 temperature for 10 min. The temperatures of the injector and detector were set at 245 and 250 °C,  
2 respectively. The glycerol concentration was measured by HPLC using a SCL-10A system  
3 (Shimadzu, Kyoto, Japan) equipped with a refractive index detector and an Aminex HPX-87H  
4 column thermostated at 65 °C. Elution was carried out with a 5 mM H<sub>2</sub>SO<sub>4</sub> mobile phase at a flow  
5 rate of 0.8 mL min<sup>-1</sup>. All reported data are averages of experiments performed at least in duplicate.

6 **Table 1s** Gradient elution program

| Time<br>(min) | Flow rate<br>(mL min <sup>-1</sup> ) | Acetonitrile-acetic acid<br>(99.85:0.15) (V/V, %) | Dichloromethane<br>(V/V, %) |
|---------------|--------------------------------------|---------------------------------------------------|-----------------------------|
| 0             | 1.50                                 | 100                                               | 0                           |
| 4             | 1.50                                 | 100                                               | 0                           |
| 12            | 1.50                                 | 90                                                | 10                          |
| 25            | 1.50                                 | 90                                                | 10                          |
| 30            | 1.50                                 | 70                                                | 30                          |
| 35            | 1.50                                 | 70                                                | 30                          |
| 45            | 1.50                                 | 20                                                | 80                          |
| 55            | 1.50                                 | 20                                                | 80                          |
| 60            | 1.50                                 | 100                                               | 0                           |
| 65            | 1.50                                 | 100                                               | 0                           |

7

### 8 **Rate constants identified<sup>1</sup>**

9 For investigating the kinetic behaviors during PSL-C-catalyzed synthesis of 1,3-diolein in these  
10 solvent systems, the synthetic scheme shown in Scheme 1 was adopted in which oleic acid and the  
11 byproduct water was neglected for simplification. The esterification reaction rates would follow  
12 second-order kinetics with respect to the concentration of each substrate involved in the respective  
13 reaction step;<sup>3,4</sup> the mass transfer limitation in the reaction system could be neglected. Based on

- 1 the above assumptions, the differential equations characterizing the whole reaction process were  
 2 listed as follows and in the equations, OA, 1-MO, 2-MO, 1,3-DO, 1,2-DO, TO and Gly referred to  
 3 oleic acid, 1-monoolein, 2-monoolein, 1,3-diolein, 1,2-diolein, triolein and glycerol, respectively.

$$\frac{d[OA]}{dt} = k_2[1-MO] + k_{10}[2-MO] + k_4[1,3-DO] + (k_6 + k_{12})[1,2-DO] + (k_8 + k_{14})[TO] - ((k_1 + k_9)[Gly] + (k_3 + k_{11})[1-MO] + k_5[2-MO] + k_7[1,2-DO] + k_{13}[1,3-DO])[OA]$$

$$\frac{d[1-MO]}{dt} = k_1[OA][Gly] + k_4[1,3-DO] + k_{12}[1,2-DO] + k_{16}[2-MO] - (k_2 + k_5 + (k_3 + k_{11})[OA])[1-MO]$$

$$\frac{d[2-MO]}{dt} = k_6[1,2-DO] + k_9[OA][Gly] + k_{15}[1-MO] - (k_5[OA] + k_{10} + k_{16})[2-MO]$$

$$\frac{d[1,3-DO]}{dt} = k_3[1-MO][OA] + k_{14}[TO] + k_{18}[1,2-DO] - (k_4 + k_{13}[OA] + k_{17})[1,3-DO]$$

$$\frac{d[1,2-DO]}{dt} = (k_5[2-MO] + k_{11}[1-MO])[OA] + k_8[TO] + k_{17}[1,3-DO] - (k_6 + k_7[OA] + k_{12} + k_{18})[1,2-DO]$$

$$\frac{d[TO]}{dt} = (k_7[1,2-DO] + k_{13}[1,3-DO])[OA] - (k_8 + k_{14})[TO]$$

$$\frac{d[Gly]}{dt} = k_2[1-MO] + k_{10}[2-MO] - (k_1 + k_9)[OA][Gly]$$

4

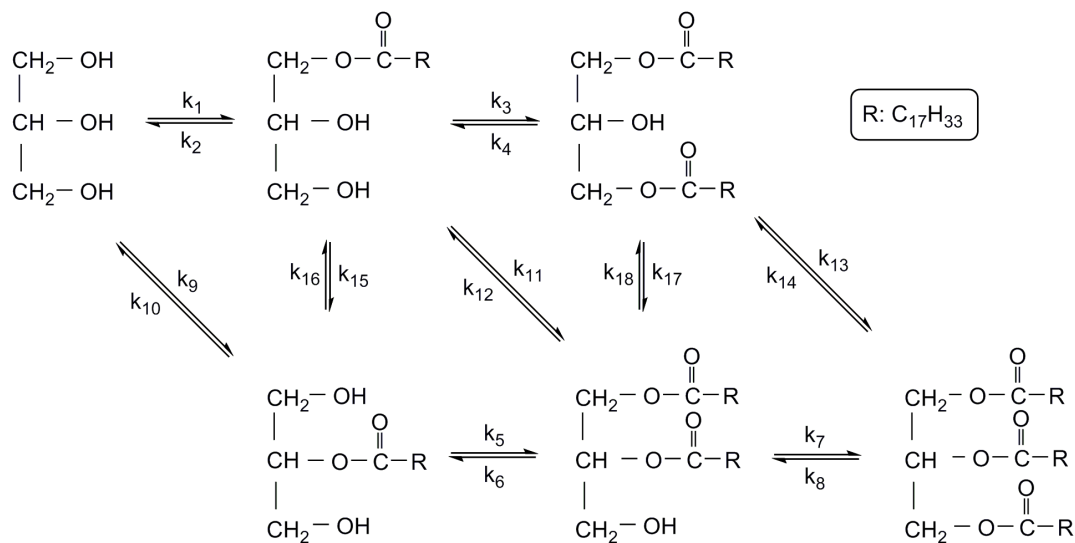

5

6

7

8

9

10

11

12

13

14

15

16

17

18

19

20

21

22

23

24

**Scheme 1**

1 Z.Q. Duan, W. Du and D.H. Liu, *Bioresour. Technol.*, 2010, **101**, 2568.  
 2 W. Du, D.H. Liu, L.L. Li and L.M. Dai, *Biotechnol. Prog.*, 2007, **23**, 1087.  
 3 T. Watanabe, M. Shimizu, M. Sugiura, M. Sato, J. Kohori, N. Yamada and K. Nakanishi, *J. Am. Oil Chem. Soc.*, 2003, **80**, 1201.

1 4 R. Lortie, M. Trani and F. Ergan, *Biotechnol. Bioeng.*, 1993, **41**, 1021.
